# Supplementary material
Source: PubMed Central journal article supplement (PMC4666538)
Supplement: NIHMS738790-supplement-Supplement.pdf [file NIHMS738790-supplement-Supplement.pdf]

## Supplemental Material List

1. Table S1 – List comparing bacterial TonB systems and motility structures
2. Table S2 – Quantitation of *tonB*, *pocA*, and *pocB* mutant cell size
3. Table S3 – List of strains used in this study
4. Table S4 – List of primers used in this study
5. Supplemental Methods – materials and methods details for experiments presented as supplemental material
6. Figure S1 – Reverse transcriptase PCR used to experimentally demonstrate co-transcription of *pocA* and *pocB*. Relevance: Co-transcription was predicted from the genome sequence but not yet published with experimental evidence.
7. Figure S2 – Swimming motility complementation of deletion mutants with full length and FLAG- and HIS-tagged proteins. Relevance: Complementation of swimming motility defects demonstrates causality of deletion mutations and provides evidence that FLAG- and HIS-tagged proteins are functional.
8. Figure S3 – Quantitation of FlhF-GFP and CheA-GFP localization. Relevance: Quantitative assessment of fluorescent fusion localization patterns in the different mutant strains.
9. Figure S4 – Co-precipitation of PocA and PocB in *tonB3* mutant. Relevance: Demonstrates that *tonB3* is not required for the physical interaction between LomA and LomB.
10. Figure S5 – Co-precipitation experiments with TonB3. Relevance: Illustrates that TonB3 cannot be precipitated by PocA or PocB under these conditions.
11. Figure S6 – Expression of flagellar genes in *poc* mutants. Relevance: Unlike pili production genes, flagellar genes are not affected by the loss of *tonB3*, *pocA*, or *pocB*.
12. Movies 1-4 – FlhF, CheA, and PilT localization during growth. Relevance: Demonstrates cellular localization patterns of flagellar and pilus proteins are different during growth.
13. Movies 5-9 – Single cell swimming of wild-type and mutant strains. Relevance: Representative examples of how flagellar mislocalization affects swimming motility in single cells.
14. Movies 10-14 – Twitching motility of wild-type and mutant strains. Relevance: Shows lack of twitching motility in Poc mutants, including *pocA* which makes non-polar pili.

Supplemental Table S1 – Bacterial TonB Systems and Motility Structures

| <b>Bacterium</b>              | <b>TonB Systems</b> | <b>Flagellum localization</b> | <b>Type IV pili</b> |
|-------------------------------|---------------------|-------------------------------|---------------------|
| <i>Pseudomonas aeruginosa</i> | 3                   | Monotrichous                  | Yes                 |
| <i>Escherichia coli</i>       | 1                   | Peritrichous                  | Yes                 |
| <i>Klebsiella pneumoniae</i>  | 1                   | Peritrichous                  | No                  |
| <i>Pseudomonas putida</i>     | 3                   | Monotrichous                  | Yes                 |
| <i>Salmonella enterica</i>    | 1                   | Peritrichous                  | No                  |
| <i>Vibrio cholerae</i>        | 2                   | Monotrichous                  | Yes                 |
| <i>Vibrio vulnificus</i>      | 3                   | Monotrichous                  | Yes                 |
| <i>Xanthomonas campestris</i> | 3                   | Monotrichous                  | Yes                 |

Supplemental Table S2 – Quantification of cell size (in pixels)

| <b>Strain</b>          | <b>Cell Width</b> | <b>Cell length</b> |
|------------------------|-------------------|--------------------|
| wildtype               | $1.30 \pm 0.02$   | $4.47 \pm 0.17$    |
| <i>tonB3</i>           | $1.29 \pm 0.01$   | $3.75 \pm 0.05$    |
| PA2983 ( <i>pocA</i> ) | $1.31 \pm 0.01$   | $3.92 \pm 0.09$    |
| PA2982 ( <i>pocB</i> ) | $1.285 \pm 0.002$ | $3.80 \pm 0.01$    |

Supplemental Table S3 – Strains used in this study

| Strain                             | Genotype                                          | Reference or source                          |
|------------------------------------|---------------------------------------------------|----------------------------------------------|
| <b><i>Pseudomonas</i> strains</b>  |                                                   |                                              |
| <i>Pseudomonas aeruginosa</i> PAO1 | Wild-type <i>P. aeruginosa</i> strain ATCC 15692  | C. Manoil, University of Washington, Seattle |
| ZG520                              | PAO1 $\Delta$ <i>tonB3</i>                        | This study                                   |
| ZG521                              | PAO1 $\Delta$ <i>pocA</i>                         | This study                                   |
| ZG522                              | PAO1 $\Delta$ <i>pocB</i>                         | This study                                   |
| ZG523                              | PAO1 $\Delta$ <i>flhF</i>                         | This study                                   |
| ZG524                              | PAO1 $\Delta$ <i>fliF</i>                         | This study                                   |
| ZG525                              | PAO1 $\Delta$ <i>pilA</i>                         | This study                                   |
| ZG506                              | PAO1 pJN105                                       | Cowles and Gitai, 2010                       |
| ZG526                              | PAO1 $\Delta$ <i>tonB3</i> pJN105                 | This study                                   |
| ZG527                              | PAO1 $\Delta$ <i>pocA</i> pJN105                  | This study                                   |
| ZG528                              | PAO1 $\Delta$ <i>pocB</i> pJN105                  | This study                                   |
| ZG529                              | PAO1 pJN( <i>tonB3</i> )                          | This study                                   |
| ZG530                              | PAO1 pJN( <i>pocA</i> )                           | This study                                   |
| ZG531                              | PAO1 pJN( <i>pocB</i> )                           | This study                                   |
| ZG532                              | PAO1 $\Delta$ <i>tonB3</i> pJN( <i>tonB3</i> )    | This study                                   |
| ZG533                              | PAO1 $\Delta$ <i>pocA</i> pJN( <i>pocA</i> )      | This study                                   |
| ZG534                              | PAO1 $\Delta$ <i>pocB</i> pJN( <i>pocB</i> )      | This study                                   |
| ZG535                              | PAO1 pJN( <i>flhF-gfp</i> )                       | This study                                   |
| ZG536                              | PAO1 $\Delta$ <i>tonB3</i> pJN( <i>flhF-gfp</i> ) | This study                                   |
| ZG537                              | PAO1 $\Delta$ <i>pocA</i> pJN( <i>flhF-gfp</i> )  | This study                                   |
| ZG538                              | PAO1 $\Delta$ <i>pocB</i> pJN( <i>flhF-gfp</i> )  | This study                                   |
| ZG539                              | PAO1 pJN( <i>cheA-gfp</i> )                       | This study                                   |
| ZG540                              | PAO1 $\Delta$ <i>tonB3</i> pJN( <i>cheA-gfp</i> ) | This study                                   |
| ZG541                              | PAO1 $\Delta$ <i>pocA</i> pJN( <i>cheA-gfp</i> )  | This study                                   |
| ZG542                              | PAO1 $\Delta$ <i>pocB</i> pJN( <i>cheA-gfp</i> )  | This study                                   |
| ZG502                              | PAO1 <i>gfp-pilT</i>                              | Cowles and Gitai, 2010                       |
| ZG543                              | PAO1 $\Delta$ <i>tonB3</i> <i>gfp-pilT</i>        | This study                                   |
| ZG544                              | PAO1 $\Delta$ <i>pocA</i> <i>gfp-pilT</i>         | This study                                   |
| ZG545                              | PAO1 $\Delta$ <i>pocB</i> <i>gfp-pilT</i>         | This study                                   |
| ZG547                              | PAO1 $\Delta$ <i>fliF</i> <i>gfp-pilT</i>         | This study                                   |
| ZG548                              | PAO1 $\Delta$ <i>pilA</i> <i>gfp-pilT</i>         | This study                                   |
| ZG549                              | PAO1 <i>pilQ-mCherry</i>                          | This study                                   |
| ZG550                              | PAO1 $\Delta$ <i>tonB3</i> <i>pilQ-mCherry</i>    | This study                                   |
| ZG551                              | PAO1 $\Delta$ <i>pocA</i> <i>pilQ-mCherry</i>     | This study                                   |
| ZG552                              | PAO1 $\Delta$ <i>pocB</i> <i>pilQ-mCherry</i>     | This study                                   |
| ZG554                              | PAO1 $\Delta$ <i>fliF</i> <i>pilQ-mCherry</i>     | This study                                   |

|                               |                                                               |            |
|-------------------------------|---------------------------------------------------------------|------------|
| ZG555                         | PAO1 $\Delta pilA pilQ$ -mCherry                              | This study |
| ZG556                         | PAO1 <i>tonB3-iFLAG</i>                                       | This study |
| ZG557                         | PAO1 <i>pocA-cFLAG</i>                                        | This study |
| ZG558                         | PAO1 <i>pocB-cFLAG</i>                                        | This study |
| ZG559                         | PAO1 pJN( <i>tonB3-iFLAG</i> )                                | This study |
| ZG560                         | PAO1 $\Delta tonB3$ pJN( <i>tonB3-iFLAG</i> )                 | This study |
| ZG561                         | PAO1 $\Delta pocA$ pJN( <i>tonB3-iFLAG</i> )                  | This study |
| ZG562                         | PAO1 $\Delta pocB$ pJN( <i>tonB3-iFLAG</i> )                  | This study |
| ZG563                         | PAO1 pJN( <i>pocA-cFLAG</i> )                                 | This study |
| ZG564                         | PAO1 $\Delta tonB3$ pJN( <i>pocA-cFLAG</i> )                  | This study |
| ZG565                         | PAO1 $\Delta pocA$ pJN( <i>pocA-cFLAG</i> )                   | This study |
| ZG566                         | PAO1 $\Delta pocB$ pJN( <i>pocA-cFLAG</i> )                   | This study |
| ZG567                         | PAO1 pJN( <i>pocB-cFLAG</i> )                                 | This study |
| ZG568                         | PAO1 $\Delta tonB3$ pJN( <i>pocB-cFLAG</i> )                  | This study |
| ZG569                         | PAO1 $\Delta pocA$ pJN( <i>pocB-cFLAG</i> )                   | This study |
| ZG570                         | PAO1 $\Delta pocB$ pJN( <i>pocB-cFLAG</i> )                   | This study |
| ZG571                         | PAO1 <i>pocA-cHIS</i>                                         | This study |
| ZG572                         | PAO1 <i>pocB-cHIS</i>                                         | This study |
| ZG573                         | PAO1 pJN( <i>pocA-cFLAG</i> ) <i>pocB-cHIS</i>                | This study |
| ZG574                         | PAO1 pJN( <i>pocB-cFLAG</i> ) <i>pocA-cHIS</i>                | This study |
| ZG575                         | PAO1 $\Delta tonB3$ <i>pocA-cHIS</i>                          | This study |
| ZG576                         | PAO1 $\Delta tonB3$ <i>pocA-cHIS</i> pJN( <i>pocB-cFLAG</i> ) | This study |
| ZG577                         | PAO1 pJN( <i>tonB3-iFLAG</i> ) <i>pocmA-cHIS</i>              | This study |
| ZG578                         | PAO1 pJN( <i>tonB3-iFLAG</i> ) <i>pocB-cHIS</i>               | This study |
|                               |                                                               |            |
| <b><i>E. coli</i> strains</b> |                                                               |            |
| ZG514                         | S17-1 $\lambda$ pir pEX18Tc ( $\Delta tonB3$ )                | This study |
| ZG515                         | S17-1 $\lambda$ pir pEX18Tc ( $\Delta pocA$ )                 | This study |
| ZG516                         | S17-1 $\lambda$ pir pEX18Tc ( $\Delta pocB$ )                 | This study |
| ZG517                         | S17-1 $\lambda$ pir pEX18Tc ( $\Delta flhF$ )                 | This study |
| ZG518                         | S17-1 $\lambda$ pir pEX18Tc ( $\DeltafliF$ )                  | This study |
| ZG519                         | S17-1 $\lambda$ pir pEX18Tc ( $\Delta pilA$ )                 | This study |

Supplemental Table S4 – Primers used in this study

| Primer               | Sequence                                          | Function                                  |
|----------------------|---------------------------------------------------|-------------------------------------------|
| 0406UpFOREcoRI       | AACGAATTCGTCTATTCGACCTACCTGCTGG                   | Deletion of <i>tonB3</i>                  |
| 0406UpREV            | GCTGGACAGGCGGAAAAGTCTATGACG                       | Deletion of <i>tonB3</i>                  |
| 0406DnFOR            | CTTTTCCGCCTGTCCAGCAAGTAGCGC                       | Deletion of <i>tonB3</i>                  |
| 0406DnREVXbaI        | NNNTCTAGATTTCGTCTGGTAAAGACCGG                     | Deletion of <i>tonB3</i>                  |
| 298382UpFOREcoRI     | NNNGAATTCATCGAACTGCTGGTAGTGCC                     | Deletion of <i>pocA</i><br>or <i>pocB</i> |
| 2983UpREV            | TTCCTCGACGGCTTGAACCAGTTCCCA                       | Deletion of <i>pocA</i>                   |
| 2983DnFOR            | GTTCAAGCCGTCGAGGAAGGCAAAGCG                       | Deletion of <i>pocA</i>                   |
| 2982UpREV            | ACATCAGGGCCGTCTGCGGCGGAATTT                       | Deletion of <i>pocB</i>                   |
| 2982DnFOR            | CGCAGACGGCCCTGATGTCGTTCTCCG                       | Deletion of <i>pocB</i>                   |
| 298382DnREVXbaI      | NNNTCTAGACCAGGAGATGCTCGAGTCGGG                    | Deletion of <i>pocA</i><br>or <i>pocB</i> |
| FlhFGWUp             | GGGGACAAGTTTGTACAAAAAAGCAGGCTTAAGAGGGGTTCGGGCAATG | Fusions to <i>flhF</i>                    |
| FlhFGWDn             | GGGGACCACTTTGTACAAAGAAAGCTGGGTACGCCGGTTGCTGGTAGAG | Fusions to <i>flhF</i>                    |
| CheAGWUp             | GGGGACAAGTTTGTACAAAAAAGCAGGCTTATCTGGGAGCAGCCGAATG | Fusions to <i>cheA</i>                    |
| CheAGWDn             | GGGGACCACTTTGTACAAAGAAAGCTGGGTAGATGCGCCGTGCGTAACG | Fusions to <i>cheA</i>                    |
| GWrfpFORSpe          | NNNACTAGTACAAGTTTGTACAAAAAAGCTG                   | Vector<br>construction                    |
| GWrfpREVSpe          | NNNACTAGTTTACTTGTACAGCTCGTCC                      | Vector<br>construction                    |
| AraCAmp              | CCGCCATTCAGAGAAGAAACC                             | Confirmation of<br>fusions                |
| FlhFreverseMluI      | GGGGACGCGTGCCGGCACGCCGCGCC                        | <i>flhF</i> -CERC<br>fusion               |
| FlhFforwardSpeI      | GGGGACTAGTCTGAGGGGTTCGGGCAATG                     | <i>flhF</i> -CERC<br>fusion               |
| CERCreverseEcoRISacI | GCCGGAGCTCAAAAGAATTCTTACTTGTACAGCTCGTC            | <i>flhF</i> -CERC<br>fusion               |
| CheAforwardEcoRI     | GGGGGAATTCCTCTGGGAGCAGCCGAATG                     | <i>cheA</i> -GFP fusion                   |
| CheAreverseMluI      | GGGGACGCGTGATGCGCCGTGCGTAA                        | <i>cheA</i> -GFP fusion                   |
| EGFPreverseXbaISacI  | GCCGGAGCTCAAAATCTAGATTACTTGTACAGCTCGTC            | <i>cheA</i> -GFP fusion                   |

|                  |                                            |                                           |
|------------------|--------------------------------------------|-------------------------------------------|
| PA0406ForRT      | CTTCACCCTGTTTCATCGC                        | qRT-PCR                                   |
| PA0406RevRT      | TGATTTCCAGGGTCTTGC                         | qRT-PCR                                   |
| PA2983ForRT      | ATCAAGGGCAAGCAACTGAG                       | qRT-PCR                                   |
| PA2983RevRT      | TGCACTCCTTCATGATCTCG                       | qRT-PCR                                   |
| PA2982ForRT      | CTGCTGTTCTTCGTGGTCAG                       | qRT-PCR                                   |
| PA2982RevRT      | CCGAGAGTTCAGTTGCTTC                        | qRT-PCR                                   |
| pilAForRT        | CGCTGAAGACCACTGTTGAA                       | qRT-PCR                                   |
| pilARevRT        | GTTTCGGTCGCAGTAGAAGC                       | qRT-PCR                                   |
| fliCForRT        | GACCTCCACTCAGGATCTGG                       | qRT-PCR                                   |
| fliCRevRT        | CGGAGGTGATGGTCAGTACA                       | qRT-PCR                                   |
| rpoDForRT        | CTCAGCGGCTATATCGATCC                       | qRT-PCR                                   |
| rpoDRevRT        | CTCGTCGTCCTTCTCTTTCG                       | qRT-PCR                                   |
| LomAUp           | TGGGA <sup>A</sup> ACTGGTTCAAGCC           | RT-PCR for <i>pocAB</i>                   |
| LomADn           | CAGCTCGTGGATGACACC                         | RT-PCR for <i>pocAB</i>                   |
| LomAMid          | AGGCATTGATCACCACCG                         | RT-PCR for <i>pocAB</i>                   |
| LomBUp           | GCTCAACATCGAGCTGCC                         | RT-PCR for <i>pocAB</i>                   |
| LomBDn           | CTGGTGGGTGGACTTGGC                         | RT-PCR for <i>pocAB</i>                   |
| LomBMid          | CTGACCACGAAGAACAGC                         | RT-PCR for <i>pocAB</i>                   |
| 0406UpFLAGEcoRI2 | NNNGAATTCTGTCCAAGGCGCGGAGTG                | Complementation and inducible FLAG fusion |
| 0406UpFLAG       | CTTGTCGTCGTCGTCCTTGTAGTCGGTCTTGCTCGGTGCCTT | Internal FLAG fusion                      |
| 0406DnFLAGXbaI2  | NNNTCTAGACTACTTGCTGGACAGCCG                | Complementation and inducible FLAG fusion |
| 0406DnFLAG       | GACTACAAGGACGACGACGACAAGCAGGCACAGAAGGCCGAG | Internal FLAG fusion                      |
| 0406UpFLAGEcoRI  | NNNGAATTCCAGCCAGCAGATCATGGC                | Native FLAG fusion                        |

|                   |                                                                 |                                           |
|-------------------|-----------------------------------------------------------------|-------------------------------------------|
| 0406DnFLAGSpeI    | NNN <u>ACTAGTAGCCAAGGCTGATCAGGC</u>                             | Native FLAG fusion                        |
| 2983cFLAGUpEcoRI  | NNN <u>GAATTC</u> CGGGGATATGCCACTGTG                            | Complementation and HIS and FLAG fusions  |
| 2983DnREVXbaI     | NNN <u>TCTAGATCACGCTTTGCCTTCCTCGAC</u>                          | Complementation                           |
| 2983cFLAGDnXbaI   | NNN <u>TCTAGATCACTTGTTCGTCGTCGTCCTTGTAGTCCGCTTTGCCTTCCTCGAC</u> | Inducible FLAG fusion                     |
| 2983cFLAGUpEcoRI2 | NNN <u>GAATTC</u> GGTTTTTCGAACAGTGGGC                           | Native FLAG fusion                        |
| 2983cFLAGDnSpeI   | NNN <u>ACTAGTTCACTTGTTCGTCGTCGTCCTTGTAGTCCGCTTTGCCTTCCTCGAC</u> | Native FLAG fusion                        |
| 2982FOREcoRI      | NNN <u>GAATTC</u> GAGGAAGGCAAAGCGTG                             | Complementation and HIS and FLAG fusions  |
| 2982DnREVXbaI     | NNN <u>TCTAGATCAGGGCTTGGCCGCCGT</u>                             | Complementation and inducible FLAG fusion |
| 2982cFLAGDnSpeI   | NNN <u>ACTAGTTCACTTGTTCGTCGTCGTCCTTGTAGTCCGGCTTGGCCGCCGTGTT</u> | Native FLAG fusion                        |
| 2983cHISDnSpeI    | NNN <u>ACTAGTTCACTTGTTCGTCGTCGTCCTTGTAGTCCGGCTTGGCCGCCGTGTT</u> | HIS fusion                                |
| 2982cHISDnSpeI    | NNN <u>ACTAGTTCACTTGTTCGTCGTCGTCCTTGTAGTCCGGCTTGGCCGCCGTGTT</u> | HIS fusion                                |

Underlined sequence indicates restriction enzyme site.



## Supplemental Methods

### *Co-transcription of pocAB*

Total RNA was isolated and processed as described in Materials and Methods. PCR reactions were performed using RNA (+/- reverse transcriptase (RT)) or DNA as template and the following primers to amplify products from internal regions of *pocA* (LomAUp and LomADn for 306bp), *pocB* (LomBUp and LomBDn for 220bp), and across the *pocAB* intergenic region (LomAMid and LomBMid for 282bp)

### *Complementation of deletion mutants*

To complement the swimming motility defects, *tonB3*, *pocA*, and *pocB* were cloned with their native RBS into pJN105 and transformed into wild-type PAO1 or the respective deletion mutant. The 960 bp *tonB3* was PCR amplified with 0406UpFLAGEcoRI2 and 0406DnFLAGXbaI2, the 635 bp *pocA* was amplified with 2983cFLAGUpEcoRI and 2983DnREVXbaI, and the 441 bp *pocB* was amplified with 2982ForEcoRI and 2982DnREVXbaI. Swimming motility was assessed by spotting wild-type and mutant strains with pJN105 or the complementing pJN (gene) construct onto LB Gm plates with 0.3% agar and incubating at 37°C for 20 h.

### *Microscopy and motility*

To microscopically observe the swimming motility of individual cells, overnight cultures were subcultured 1:100 in LB broth, incubated at 37°C for 3h, placed on pads made from 1% agarose in PBS, and visualized by microscopy. Time lapse images were taken with no delay for 15 seconds to create movies. To observe twitching motility, 1mm<sup>3</sup> cubes of agar were removed from 1% agar LB plates and inverted on slides. Overnight cultures of wild-type and mutant PAO1

strains were spotted on the agar surface and twitching at the leading edge of motility was monitored by microscopy. When cells were spotted onto the agar pads, the arrangement of cells at the leading edge of motility varied from spot to spot. Any apparent differences seen between strains in terms of cell arrangement at the beginning of the time lapse movies (i.e. populations with flat edges versus individual or groups of cells) were not strain specific, but instead were happenstance based on the way the spotted culture dried on the pad.

#### *Quantification of FlhF-GFP and CheA-GFP localization and cell size*

For quantitation of fluorescence, cells expressing FlhF-GFP or CheA-GFP fusions were imaged using NIS Elements software with a Nikon Ti-E microscope equipped with a 100X 1.4NA objective and an Andor Clara camera. Images were analyzed using our own software written in Matlab 2013a. Binary masks of individual cells were constructed using the Canny edge detection algorithm to detect cell edges in phase contrast images. The position of each cell centroid was determined from the binary mask. The pixel with the greatest intensity in the fluorescence channel for each cell was identified and the 5x5 pixel region surrounding it was isolated and fit to the form  $I = ae^{-\left(\frac{x-b}{c}\right)^2}$ , where  $a$  was taken to be the intensity amplitude. Pixel regions with intensity amplitudes that were 10% greater than the average fluorescence within the cell were considered to be localized foci and those below this value were considered to be diffuse. The distance from the cell centroid was computed for all localized foci. Foci that were greater than 0.35 unit cell lengths from the cell centroid were considered to be polar while those less than this value were considered to be non-polar.

The width and length of individual cells were computed from binary masks constructed using the Canny edge detection algorithm using our own software written in Matlab 2013a. The length of the minor and major axes were computed from the second central moments of the binary masks. The minor or major axis length was taken to be the width or length of the cell, respectively. At least 200 cells were analyzed in each experiment. Data values in Table S2 are the average of three independent experiments and errors indicate standard deviation.

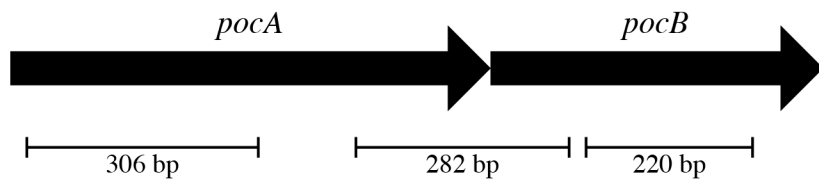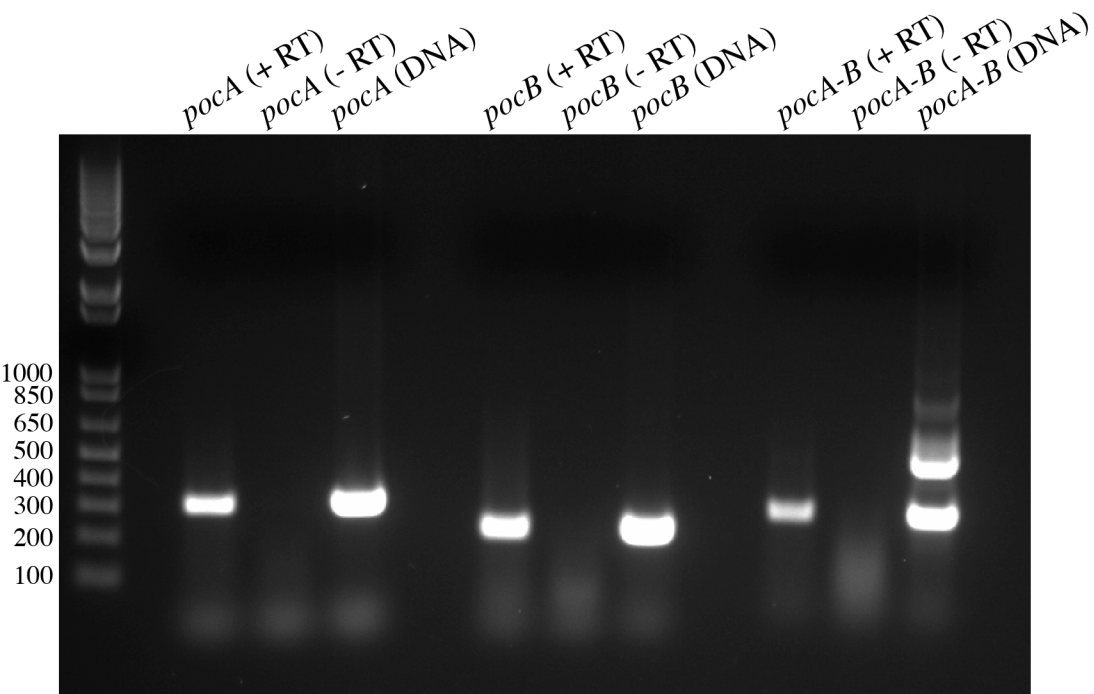

Figure S1. RT-PCR to examine the operon structure of *pocAB*. PCR reactions were performed using RNA (+/- reverse transcriptase (RT)) or DNA as template to amplify products from internal regions of *pocA* (306bp) and *pocB* (220bp) and across the *pocA-B* intergenic region (282bp).

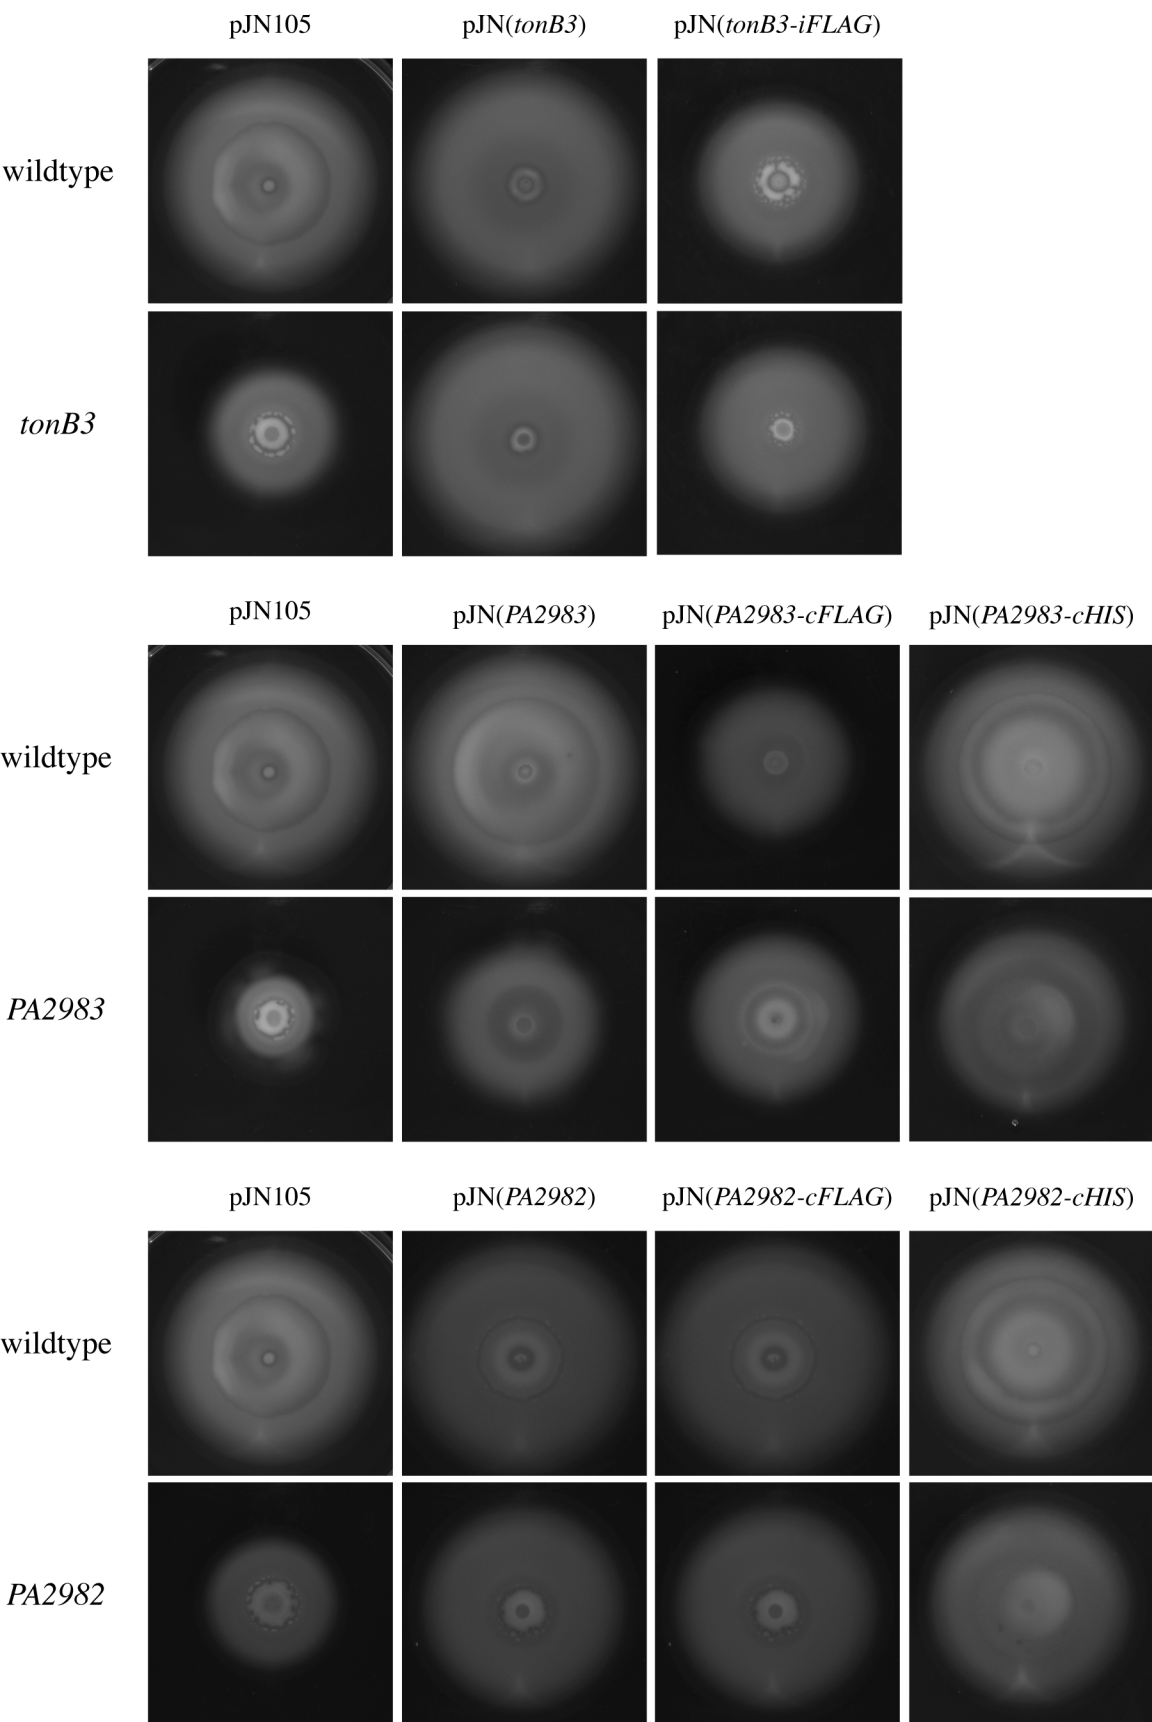

Figure S2. Complementation of *tonB3*, *PA2983*, and *PA2982* mutant swimming motility defects. Top (wildtype) and bottom (mutant) panels are representative images of strains carrying empty vector (pJN105), full length, FLAG-tagged, or HIS-tagged constructs.

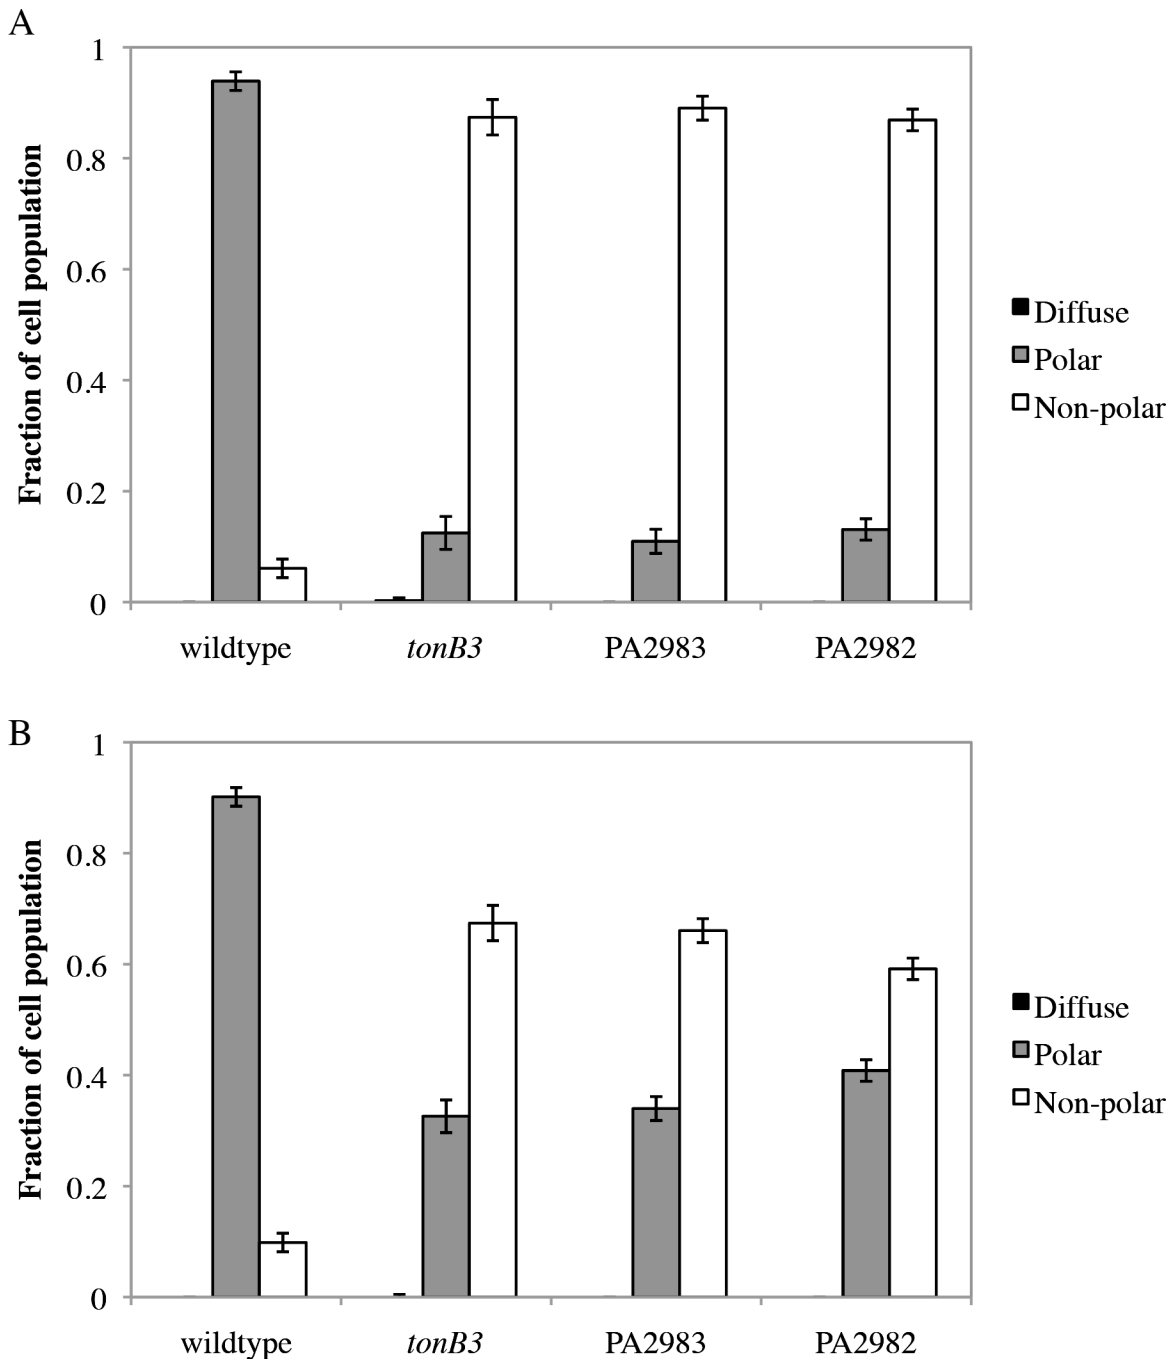

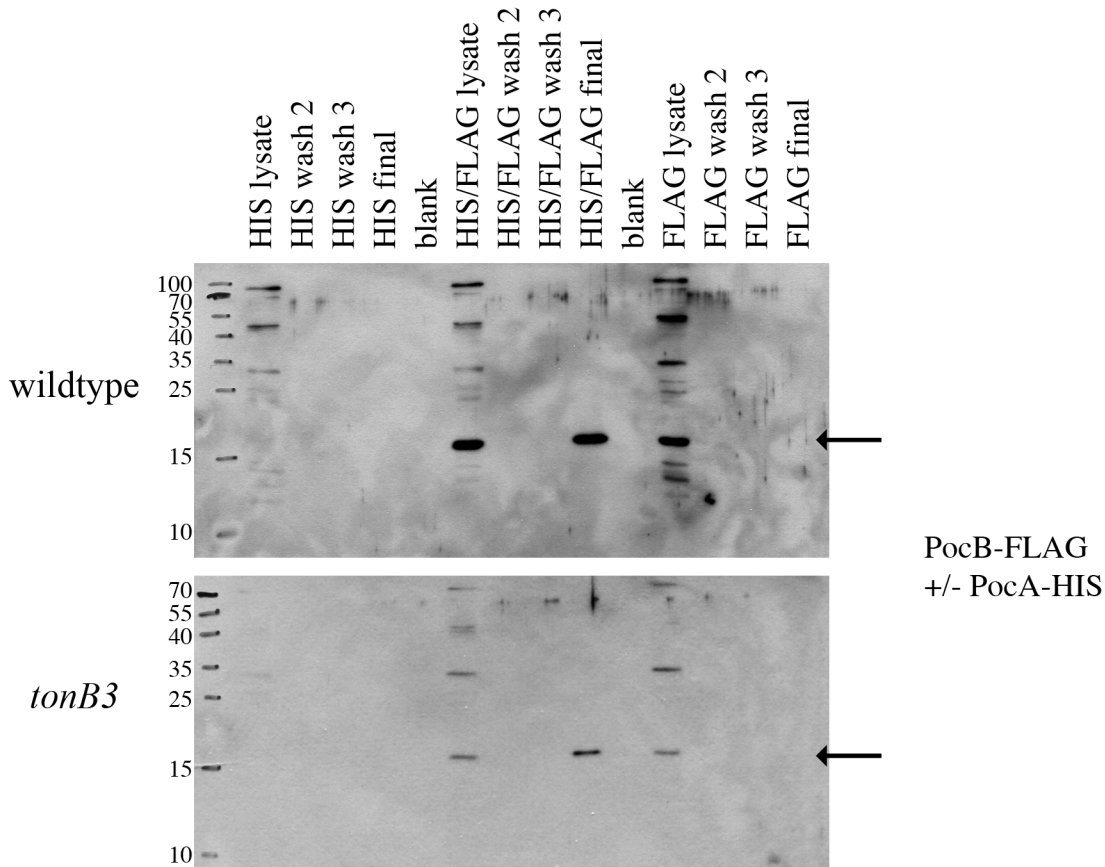

Figure S4. Western blots using anti-FLAG antibodies to detect PocB-FLAG during co-precipitation of PocA (22.9 kDa) and PocB (15.7 kDa) using HIS and FLAG tagged proteins. HIS or FLAG labels indicate negative control strains carrying only one fusion protein. HIS/FLAG denotes the strain carrying both PocB-FLAG with PocA-HIS in wildtype (top) or *tonB3* mutant (bottom). Arrows indicate PocB-FLAG.

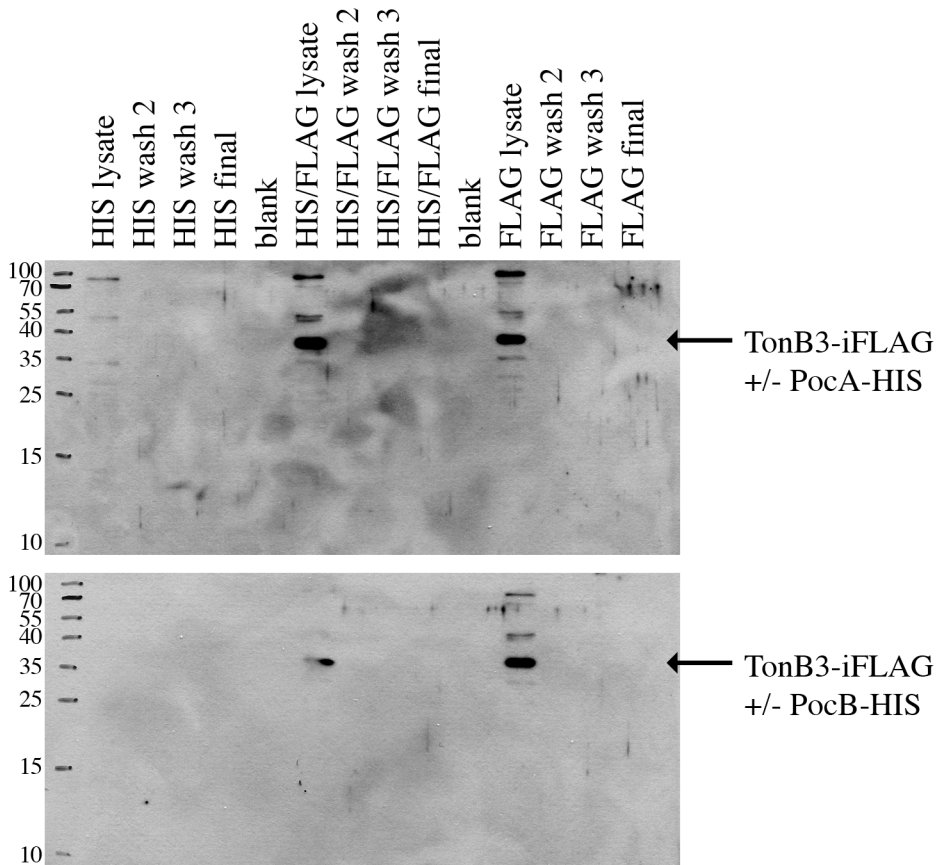

Figure S5. TonB3 does not co-precipitate with PocA or PocB. Western blots using anti-FLAG antibodies to detect internally FLAG-tagged TonB3 (36.3 kDa) after incubation with Ni resin to precipitate C-terminally HIS-tagged PocA (top) or PocB (bottom). Lysates, two wash fractions, and the final precipitated sample are shown for strains carrying either the HIS or FLAG tagged protein or both (HIS/FLAG).



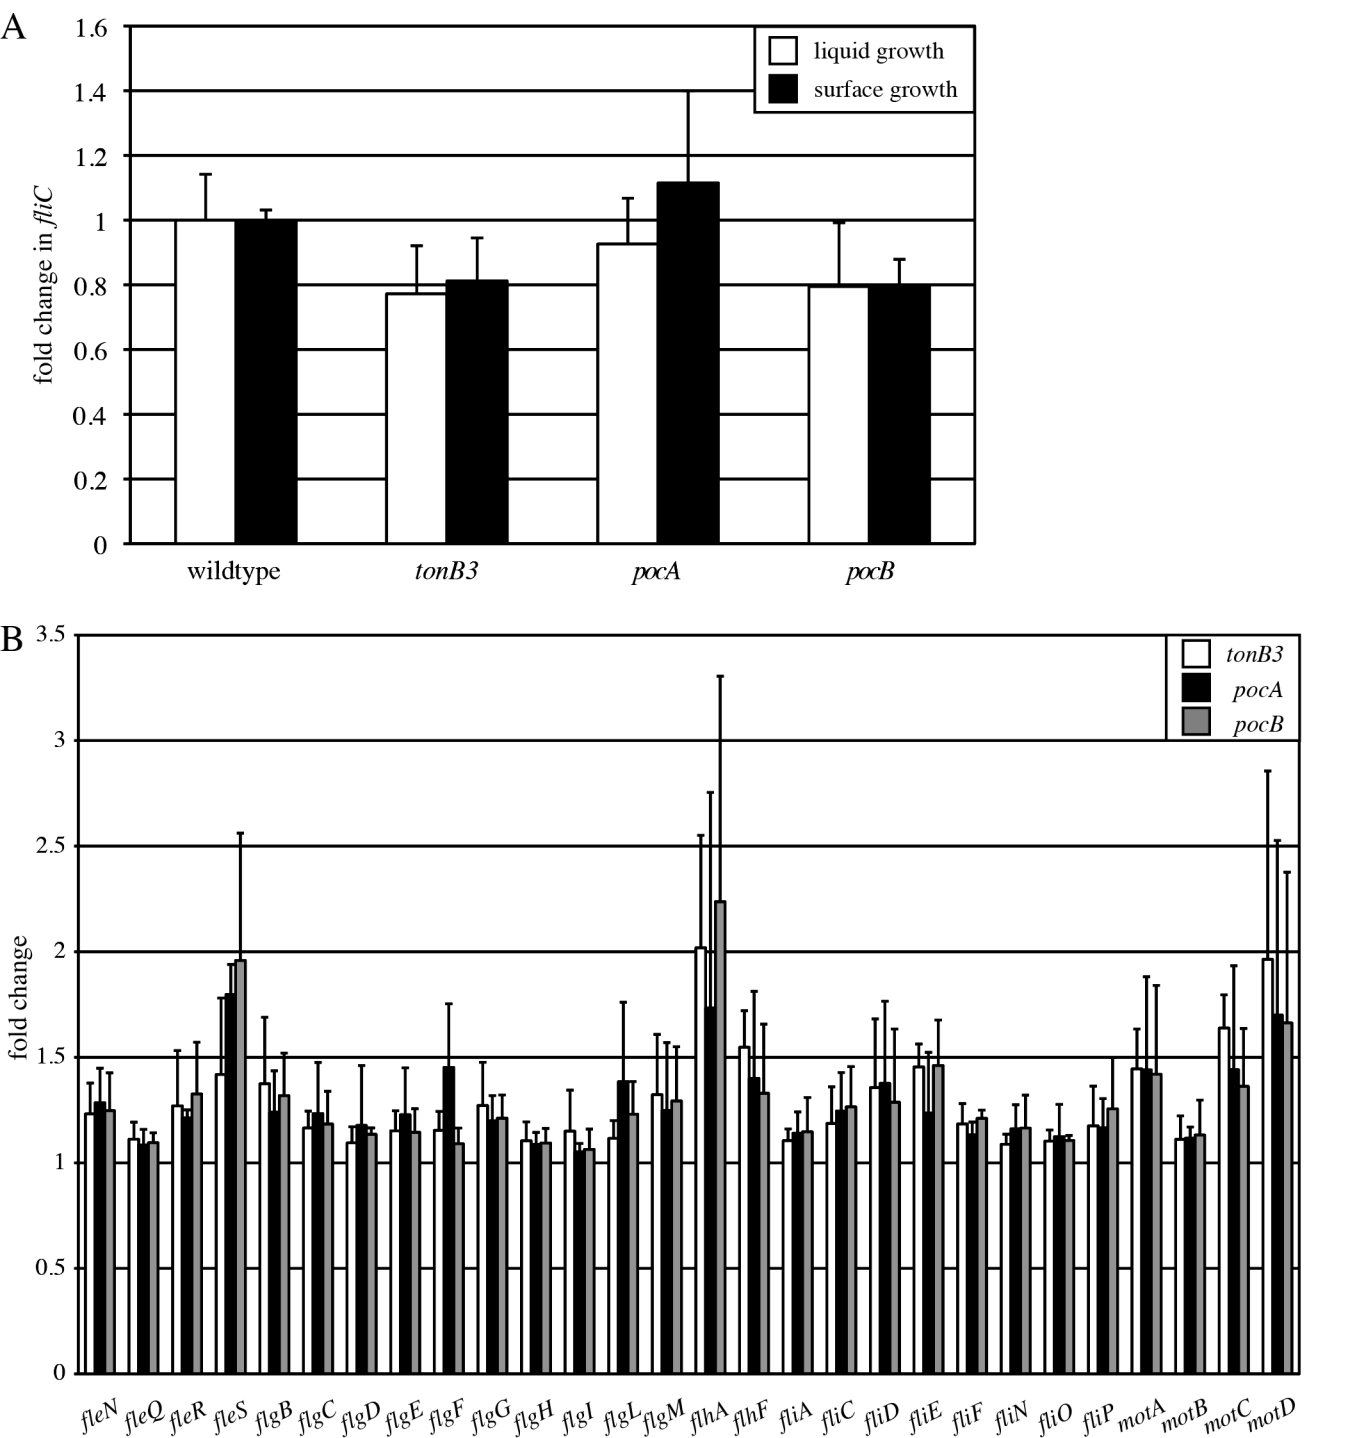

Figure S6. Flagellar gene expression is generally unaffected by mutations in *tonB3*, *pocA*, or *pocB*. (A) Fold changes in *fliC* expression in wild-type and mutant cells grown in stationary phase in liquid medium (white bars) and in cells taken from the leading edge of motility on agar plates (black bars). (B) Flagellar gene expression from the microarray analysis in *tonB3* (white bars), *pocA* (black bars) and *pocB* (gray bars) mutants. Fold change denotes expression levels in wildtype PAO1 / expression levels in each mutant. Thus, a value of 1 indicates equal expression between strains while values >1 indicate higher expression in wildtype compared to the mutant. Error bars indicate standard error (n=4).
